# Supplementary material
Source: PubMed Central journal article supplement (PMC3865059)
Supplement: cc-12-2691-s01.pdf [file cc-12-2691-s01.pdf]

## **Supplemental Material to:**

**Brian Rady, Yanmei Chen, Pilar Vaca, Qian Wang, Yong Wang, Patrick Salmon, and José Oberholzer**

**Overexpression of E2F3 promotes proliferation of functional human  $\beta$  cells without induction of apoptosis**

**Cell Cycle 2013; 12(16)**

**<http://dx.doi.org/10.4161/cc.25834>**

**<http://www.landesbioscience.com/journals/cc/article/25834>**

## Online Supplemental Materials

**Supplemental Table 1: Islet donor information**

| <b>Isolation ID</b> | <b>Age</b> | <b>Sex</b> | <b>BMI (kg/m<sup>2</sup>)</b> | <b>Purity (%)</b> | <b>Cold Ischemia Time (hh:mm)</b> |
|---------------------|------------|------------|-------------------------------|-------------------|-----------------------------------|
| H1                  | 58         | F          | 25.8                          | 95                | 3:54                              |
| H2                  | 57         | F          | 19.7                          | 85                | 4:08                              |
| H3                  | 49         | M          | 30                            | 90                | 10:21                             |
| H4                  | 48         | M          | 34.9                          | 81.50             | 9:35                              |
| H5                  | 52         | F          | 27.9                          | 90                | 7:15                              |
| H6                  | 54         | M          | 25.3                          | 92.50             | 12:33                             |
| H7                  | 44         | F          | 39.2                          | 91                | 5:41                              |
| H8                  | 70         | M          | 25.3                          | 75                | 6:36                              |
